# Supplementary material for: Fluorescent delivery vehicle containing cobalt oxide–umbelliferone nanoconjugate: DNA/protein interaction studies and anticancer activity on MF7 cancer cell line
Source: Royal Society of Chemistry journal article supplement (doi:10.1039/c9ra02412c), 2019-01-01
Supplement: c9ra02412c1.pdf [file c9ra02412c1.pdf]

## Fluorescent delivery vehicle containing cobalt oxide-umbelliferone nanoconjugate: DNA/protein interactions studies and anticancer activity on MF7 cancer cell line

Mohd. Sajid Ali<sup>¶</sup>, Sartaj Tabassum,<sup>¶,§,\*</sup> Hamad A.Al-Lohedan<sup>¶</sup>, Mohammad Abul Farah<sup>§</sup>, Khalid Mashay Al-Anazi<sup>§</sup>, and Mohd Usman<sup>§</sup>

<sup>¶</sup>*Surfactant Research Chair, Department of Chemistry, College of Sciences, King Saud University, P.O. Box 2455, Riyadh 11451, KSA.*

<sup>§</sup>*Department of Zoology, College of Sciences, King Saud University, Riyadh 11451, KSA.*

<sup>§</sup> *Department of Chemistry, Aligarh Muslim University, Aligarh-2002, India.*

*\*corresponding author, email: tsartaj62@yahoo.com, +919358255791, +966530128012.*

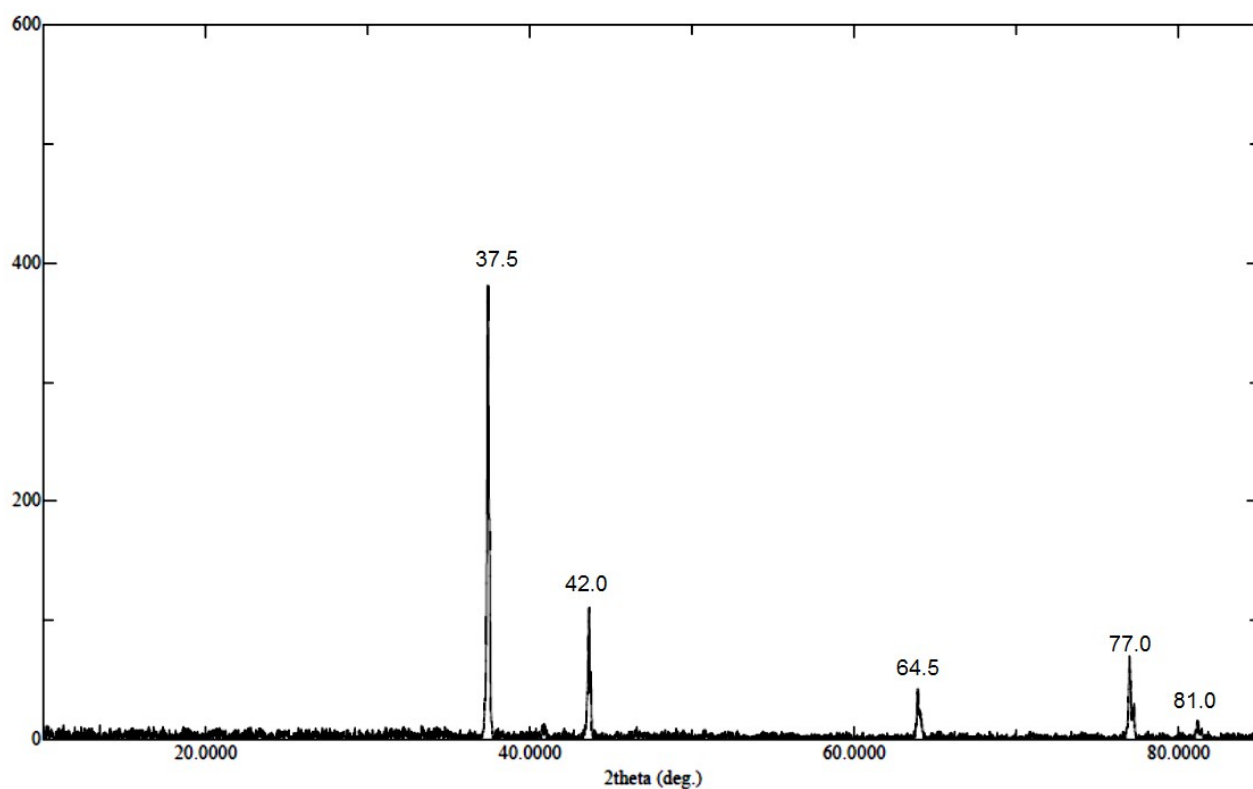

**Fig. S1.** XRD pattern of nanoconjugate.

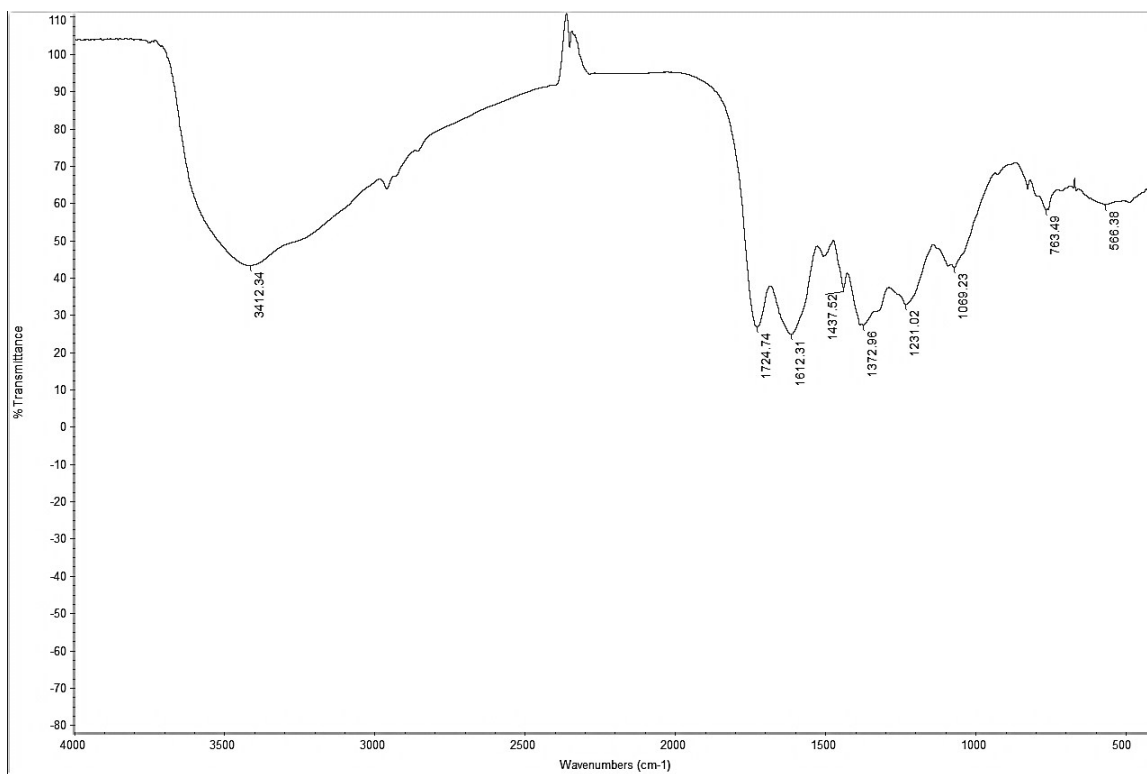

**Fig. S2.** FT IR of nano conjugate.

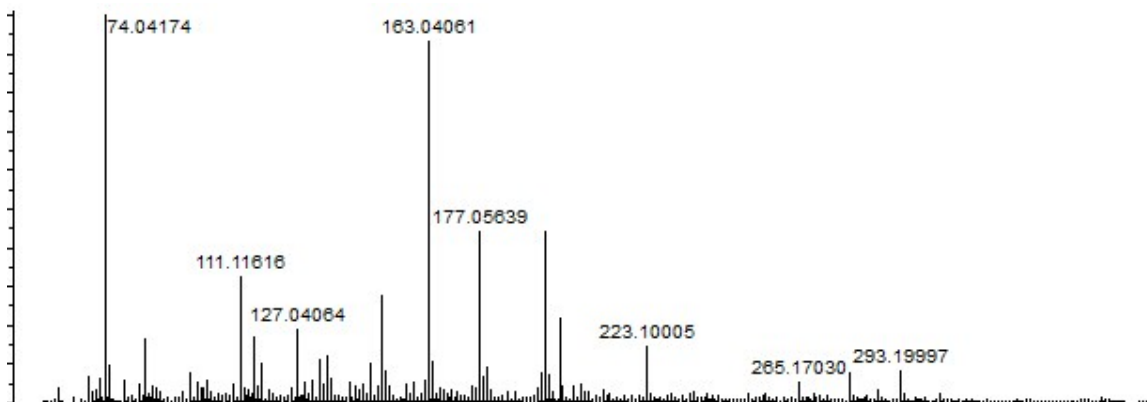

**Fig. S3.** Mass spectrogram.

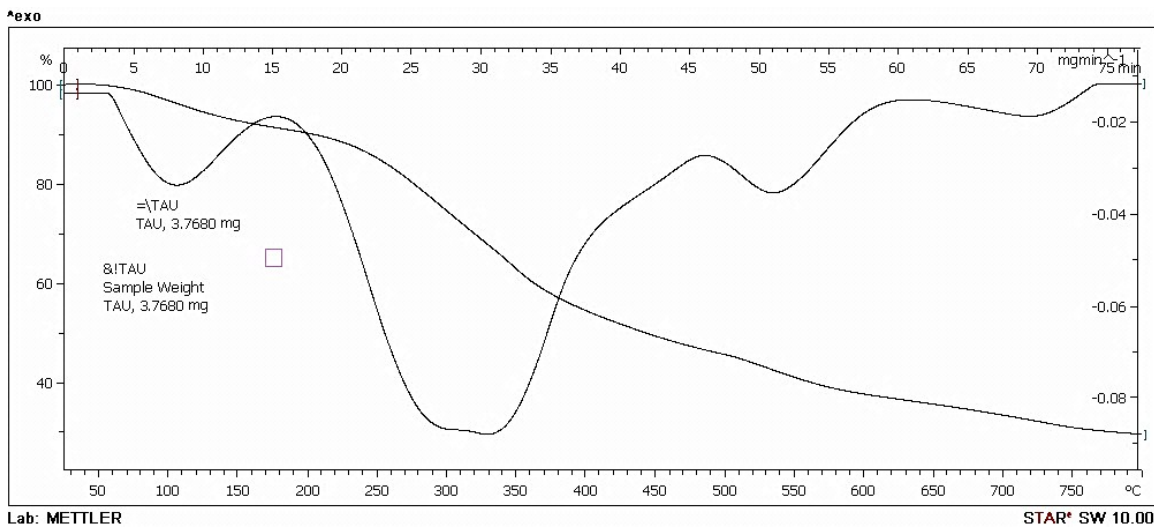

**Fig S4.** TGA curve showing dehydration (100 to 120 °C), conjugate degradation (150 °C) and complete decomposition of umbelliferone (500 °C).

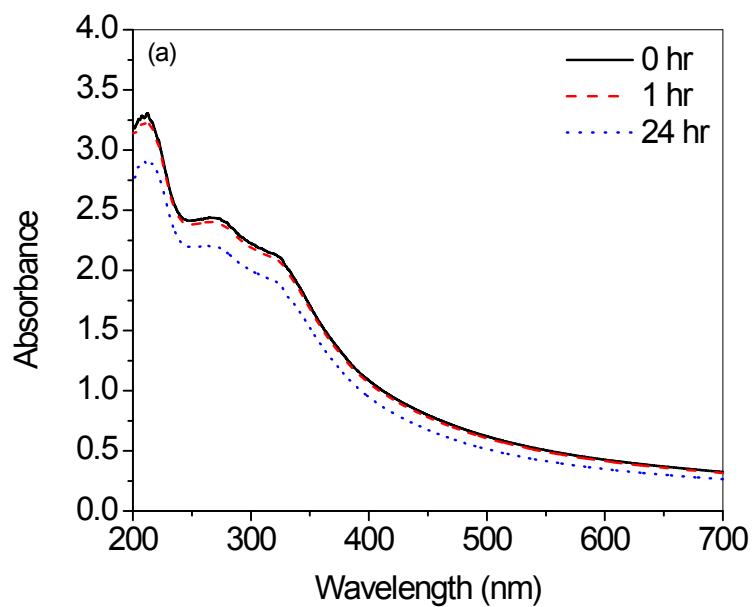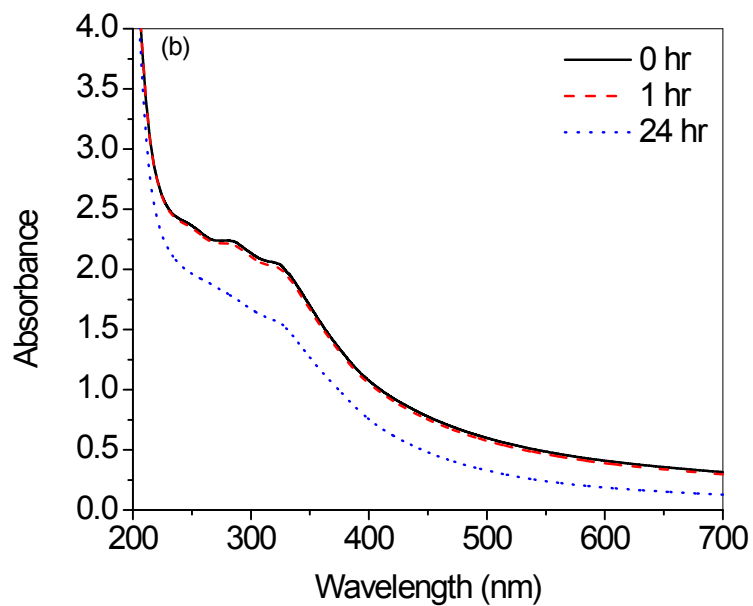

**Fig. S5** . UV-visible spectra of nano-conjugate in water (a) and in medical grade saline (b) at physiological pH.

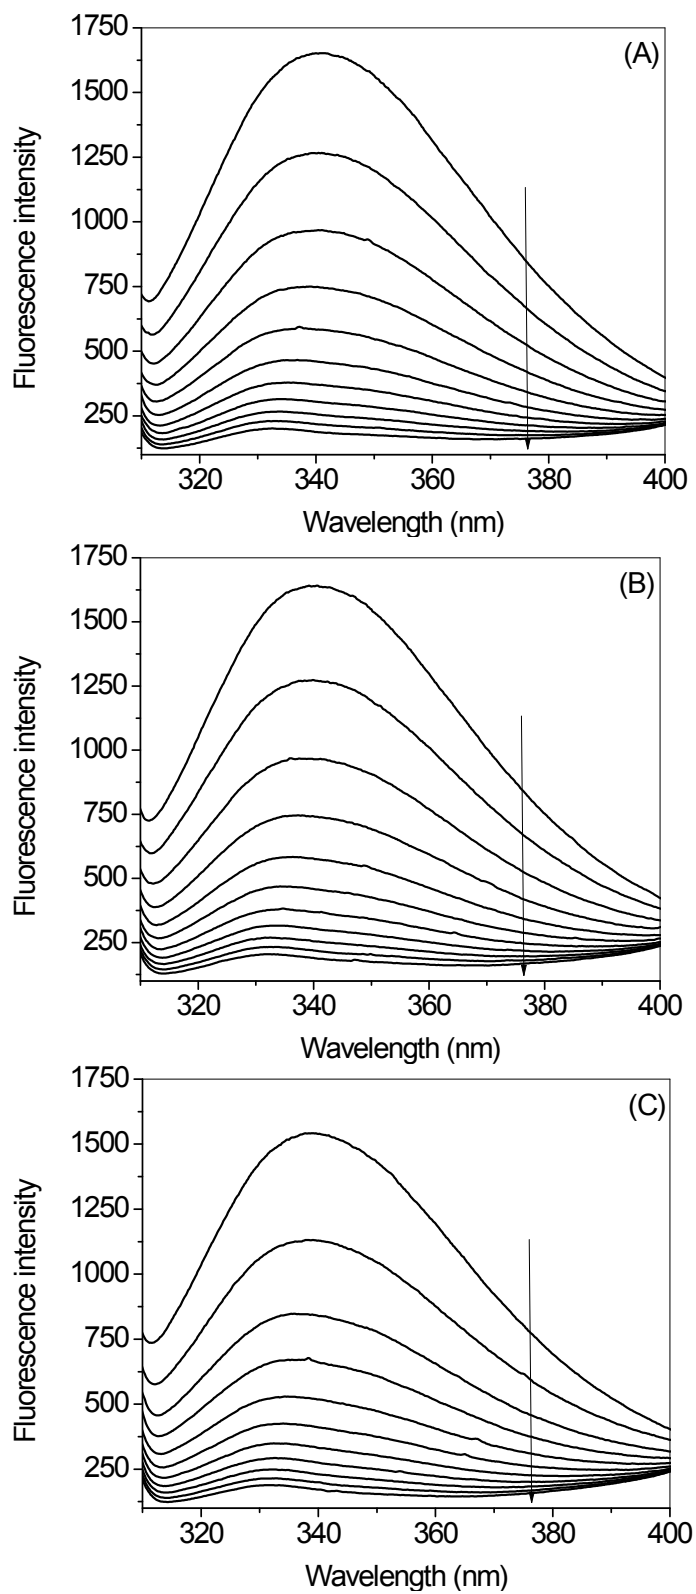

**Fig. S6 .** Fluorescence emission spectra of HSA in presence of complex ((0-50  $\mu\text{M}$ ) at 25 (A), 35 (B) and 45  $^{\circ}\text{C}$ ) (C).

**Table S1** Non-covalent interactions of drug nano conjugate with the DNA.

| Name                  | Distance (Å) | Category      | Type                       |
|-----------------------|--------------|---------------|----------------------------|
| B:DA18:H7 - :UNK1:O   | 2.54759      | Hydrogen Bond | Conventional Hydrogen Bond |
| :UNK1:O1 - A:DG2:OP2  | 3.26434      | Hydrogen Bond | Conventional Hydrogen Bond |
| :UNK1:O1 - B:DA18:O5' | 3.09537      | Hydrogen Bond | Conventional Hydrogen Bond |
| :UNK1:O1 - B:DT20:O4  | 2.68346      | Hydrogen Bond | Conventional Hydrogen Bond |
| B:DA18:C8 - :UNK1:O1  | 3.44795      | Hydrogen Bond | Carbon Hydrogen Bond       |
| B:DT19:C6 - :UNK1:O   | 3.78895      | Hydrogen Bond | Carbon Hydrogen Bond       |
| :UNK1:CO1 - A:DC3:OP2 | 3.2737       | Other         | Metal-Acceptor             |
| :UNK1:CO1 - A:DG2:OP2 | 2.26097      | Other         | Metal-Acceptor             |
| :UNK1:CO1 - A:DG4:OP2 | 3.21028      | Other         | Metal-Acceptor             |
| :UNK1:CO1 - A:DC3:OP1 | 3.37747      | Other         | Metal-Acceptor             |
| :UNK1:CO1 - A:DG2:OP2 | 2.97496      | Other         | Metal-Acceptor             |
| :UNK1:CO1 - A:DG2:O5' | 2.90564      | Other         | Metal-Acceptor             |
| :UNK1:CO1 - B:DT20:O4 | 2.89256      | Other         | Metal-Acceptor             |
| :UNK1:CO1 - A:DG4:O6  | 2.94738      | Other         | Metal-Acceptor             |
| :UNK1:CO1 - B:DT20:O4 | 2.97297      | Other         | Metal-Acceptor             |
| :UNK1:CO1 - B:DT19:O4 | 2.96698      | Other         | Metal-Acceptor             |
| B:DA17:OP2 - :UNK1    | 2.93723      | Electrostatic | Pi-Anion                   |
| B:DA17:OP2 - :UNK1    | 2.74523      | Electrostatic | Pi-Anion                   |
| B:DT20:OP2 - :UNK1    | 4.78854      | Electrostatic | Pi-Anion                   |
| B:DA17:O5' - :UNK1    | 2.85204      | Other         | Pi-Lone Pair               |
| B:DA18:H7 - :UNK1:O   | 2.54759      | Hydrogen Bond | Conventional Hydrogen Bond |
| :UNK1:O1 - A:DG2:OP2  | 3.26434      | Hydrogen Bond | Conventional Hydrogen Bond |
| :UNK1:O1 - B:DA18:O5' | 3.09537      | Hydrogen Bond | Conventional Hydrogen Bond |
| :UNK1:O1 - A:DC3:OP2  | 2.03019      | Hydrogen Bond | Conventional Hydrogen Bond |
| :UNK1:O1 - B:DT20:O4  | 2.68346      | Hydrogen Bond | Conventional Hydrogen Bond |
| B:DA18:C8 - :UNK1:O1  | 3.44795      | Hydrogen Bond | Carbon Hydrogen Bond       |
| B:DT19:C6 - :UNK1:O   | 3.78895      | Hydrogen Bond | Carbon Hydrogen Bond       |
| :UNK1:CO1 - A:DC3:OP2 | 3.2737       | Other         | Metal-Acceptor             |
| :UNK1:CO1 - A:DG2:OP2 | 2.26097      | Other         | Metal-Acceptor             |
| :UNK1:CO1 - A:DG4:OP2 | 3.21028      | Other         | Metal-Acceptor             |
| :UNK1:CO1 - A:DC3:OP1 | 3.37747      | Other         | Metal-Acceptor             |
| :UNK1:CO1 - A:DG2:OP2 | 2.97496      | Other         | Metal-Acceptor             |
| :UNK1:CO1 - A:DG2:O5' | 2.90564      | Other         | Metal-Acceptor             |
| :UNK1:CO1 - B:DT20:O4 | 2.89256      | Other         | Metal-Acceptor             |
| :UNK1:CO1 - A:DG4:O6  | 2.94738      | Other         | Metal-Acceptor             |
| :UNK1:CO1 - B:DT20:O4 | 2.97297      | Other         | Metal-Acceptor             |
| :UNK1:CO1 - B:DT19:O4 | 2.96698      | Other         | Metal-Acceptor             |
| B:DA17:OP2 - :UNK1    | 2.93723      | Electrostatic | Pi-Anion                   |
| B:DA17:OP2 - :UNK1    | 2.74523      | Electrostatic | Pi-Anion                   |
| B:DT20:OP2 - :UNK1    | 4.78854      | Electrostatic | Pi-Anion                   |
| B:DA17:O5' - :UNK1    | 2.85204      | Other         | Pi-Lone Pair               |

Note: UNK1 = NANO-DRUG-CONJUGATE

### **Cell culture and treatments**

The MCF-7 human breast adenocarcinoma cell line was obtained from American Type Culture Collection (ATCC, Rockville, MD, USA). The cells were cultured in DMEM with 10% FBS and 1% penicillin/ streptomycin in a completely humidified atmosphere with 95% air and 5% CO<sub>2</sub> at 37 °C. The exponentially growing cells were sub-cultured into 6-well or 96-well plates or Nunc Lab-Tek II chamber slides according to the experimental requirements. The viability of the cells was determined by trypan blue test. The cells were counted using a cell counter (Bio Rad TC20 automated cell counter) and diluted in medium at a density of  $1 \times 10^5$  cells/ mL to be used throughout the experiments. A stock solution of Test compounds TiO<sub>2</sub>, Complex and mix (TTU) was prepared in Millipore water (w/v) and was then diluted in cell culture medium to obtain the desired concentrations for cell treatment.

### **Cytotoxicity assay**

The 3-(4,5-dimethylthiazol-2-yl)-2,5-diphenyl tetrazolium bromide (MTT) colorimetric assay with modification was used to analyze the cytotoxic activity of test compounds. A CellTitre 96<sup>®</sup> non-radioactive cell proliferations assay kit (Promega, Madison, WI, USA) was used following the manufacturer's instructions. Briefly, the MCF-7 cells ( $1 \times 10^4$  cells/ well) were grown overnight in 96-well flat bottom cell culture plates, and were then exposed to six different concentrations of TiO<sub>2</sub>, Complex and mix (TTU) (250 µg/ mL, 200 µg/ mL, 150 µg/ mL, 100 µg/ mL, 50 µg/ mL and 25 µg/ mL) for 24 hrs. A negative control (untreated) was also maintained for comparison. After the completion of the desired treatment, 15 µl of MTT reagent, provided in the kit, was added to each well and further incubated for 3 hrs at 37 °C. Finally, the medium with MTT solution was removed, and 200 µl of solubilization solution was added to each well and further incubated for 30 min by occasional vortexing. The optical density (OD) of each well was measured at 550 nm by using a Synergy microplate reader (BioTek, Winooski, VA, USA). Results were generated from three independent experiments and each experiment was performed in triplicate. The percentage of cytotoxicity compared to the untreated

cells was estimated in order to determine the IC<sub>50</sub> value (the concentration at which 50% cell proliferation is inhibited).

### **Morphological changes analysis**

MCF-7 cells were seeded in a 6-well plate at a density of  $1 \times 10^5$  cells per well and allowed to grow overnight. Morphological changes were observed to determine the alterations induced by half of IC<sub>50</sub> concentrations of TiO<sub>2</sub>, nano conjugate and mix TiO<sub>2</sub> respectively. After the end of the incubation period (24 h), cells were washed with PBS (pH- 7.4) and observed under a phase contrast inverted microscope equipped with a CCD camera (Olympus IX51, Tokyo, Japan) at 100× magnification.

### **Intracellular reactive oxygen species (ROS) measurement**

The generation of intracellular ROS was monitored using 5-(and-6)-carboxy-2',7'-dichlorodihydrofluorescein diacetate (carboxy-H<sub>2</sub> DCFDA). For the quantitative estimation of intracellular ROS by spectrofluorometry,  $1 \times 10^4$  cells per well were seeded in 96-well culture plates (black-bottomed) and allowed to adhere for overnight in a CO<sub>2</sub> incubator at 37°C. Then, cells were treated with half of IC<sub>50</sub> concentrations of TiO<sub>2</sub> (75µg/mL), complex (65µg/mL) and Mix (52µg/mL) followed by incubation for 24 hours at 37 °C. At the end of the respective treatment period, cells were washed twice with PBS and then incubated with 25 µM working solution of carboxy-H<sub>2</sub> DCFDA in a serum free medium at 37 °C for 30 min. The reaction mixture was discarded and replaced by 100 µL of PBS in each well. The green fluorescence intensity was detected using a Synergy microplate reader (BioTek, Winooski, VA, USA) at an excitation wavelength of 485 nm and an emission wavelength of 528 nm. The values were averaged from multiple wells and expressed as a percentage of fluorescence intensity relative to the control wells. Similarly, the qualitative analysis of intracellular ROS by fluorescence microscopic imaging was achieved by seeding the cells on Nunc Lab Tek II chamber slides at  $1 \times 10^5$  cells/ chamber. Then the cells were treated and processed as indicated above. Finally, after washing with PBS the stained cells in chambers were covered with cover slips and images were collected using appropriate filter settings in a compound microscope (Olympus BX41, Japan) fitted with fluorescence attachment and a CCD camera.



### **Detection of autophagy by acridine orange staining**

As a marker of autophagy induction, acidic vesicular organelles (AVOs), which consist predominantly of autophagosomes and autolysosomes, were observed by fluorescence microscopy after staining of cells with acridine orange (AO). AO is a fluorescent weak base that accumulates in acidic vesicular spaces and fluoresce bright red. The intensity of the red fluorescence is proportional to the degree of AVO formation. MCF-7 cells were grown in Nunc Lab Tek II chamber slides and treated with half of IC<sub>50</sub> concentrations of TiO<sub>2</sub> (75µg/mL), complex (65µg/mL) and Mix (52µg/mL) and incubated for 24 hours at 37 °C. Then, the cells were washed twice with PBS and then incubated with 5 µg/ mL working solution of AO in a serum free medium at room temperature for 15 min in the dark. The reaction mixture was discarded and replaced by 100 µL of PBS in each chamber. Finally, the AO stained cells were observed in a compound microscope (Olympus BX41, Japan) fitted with fluorescence attachment and a CCD camera.

### **DNA Fragmentation assay:**

Apoptotic DNA fragmentation was analyzed by extracting genomic DNA from MCF-7 cells by using Apoptosis DNA ladder kit (Roche Diagnostics, Mannheim, Germany). Briefly, 1x10<sup>5</sup> cells/ mL were grown for overnight and exposed to half of IC<sub>50</sub> concentrations of TiO<sub>2</sub> (75µg/mL), complex (65µg/mL) and Mix (52µg/mL) in 6-well plates for 24 h. The concentration and purity of the DNA thus extracted was determined by reading the absorbance at 260 nm, and protein contamination estimates were based on the ratio of absorbance at 260/280 nm. For the analysis of DNA laddering, 1.5% agarose gel was prepared, and the DNA was separated by electrophoresis. An equal amount of DNA from the treated and control group was mixed with 1X tracking dye (bromophenol blue) and loaded into wells of agarose gel. A standard 100 base pair DNA marker was also loaded in order to compare the DNA laddering. After the electrophoresis, the DNA was stained with 20 µg/ mL of ethidium bromide and the gel was visualized under UV light and photographed using a Gel Doc XR System (Bio-RAD Lab. Milan, Italy).
